# Supplementary material for: The VvWRKY37 Regulates Bud Break in Grape Vine Through ABA-Mediated Signaling Pathways
Source: Front Plant Sci. 2022 Jun 16;13:929892. doi: 10.3389/fpls.2022.929892 (PMC9245421; doi:10.3389/fpls.2022.929892)
Supplement: Supplementary file 2 [file Table_1.XLSX]

## Sheet: primer paris
Table S1 All primer pairs used in this paper
Gene ID from NCBI	real-time RT-PCR
100232866	RT-Vvactin-F	GAGATTCCGTTGTCCAGAAGTC
	RT-Vvactin-R	CAATGTTGCCATAGAGGTCCTT
100267688	RT-VvWRKY37-F	CGCCTAATTCCTTGGACAC
	RT-VvWRKY37-R	CTTCACACCCTCCTCCCTGC
100260462	RT-VvCYP707A2-F	CGGGCACAAACTCGACTTAG
	RT-VvCYP707A2-R	ATGGCTCTGCGGAAGGGAGT
100246968	RT-VvCYP707A4.2-F	GGCCGGCGGGCAGGTCATTA
	RT-VvCYP707A4.2-R	TAATTACCCTCCAAGTGACC
100267651	RT-VvCYP707A4.3-F	AGCATATTTGGGCAGACTCA
	RT-VvCYP707A4.3-R	CATTTCCCACTAGCTCTGCG
100243434	RT-VvABI5-F	TACGGTTTATCATCACAGC
	RT-VvABI5-R	TAGGAGGTTGATTAGGAACTA
100232889	RT-VvABF2-F	TACTCGCTGACCTTTGACG
	RT-VvABF2-R	GCTACCGCAGCCATAGTTT
7458289	PtUbi-F	TTGCCTTCTTGTTTGATGGT
	PtUbi-R	TTCACAGCACCACCAGTTTG
18098425	RT-PtCYP707A1-F	GTCACTGAAGAGCAGGAG
	RT-PtCYP707A1-R	CTTGAAGTTATCGGCATC
7468629	RT-PtCYP707A2-F	TGTCCTCAGACTTCTTCCCACT
	RT-PtCYP707A2-R	TAATCCCGCCCATTTCCA
18104892	RT-PtCYP707A4-F	CAATCCGCAAACTGAACG
	RT-PtCYP707A4-R	CAGCCACTGCTTCCCTAA
7472358	RT-PtNCED1-F	ATTGCTCTCTCCAAACCCCT
	RT-PtNCED1-R	TTCCATTGCTTTTGCTGTTG
18095516	RT-PtNCED3-F	GGCAAGTCAACTCGCCGTCC
	RT-PtNCED3-R	AAGTGCTAAGTAAGCGAACC
18103239	RT-PtNCED5-F	CACTGAAACGGAAAGGCTAA
	RT-PtNCED5-R	CTCCAGTTCCTTTTGTATGA
7493195	RT-PtNCED6-F	TTGATTTGGAGACTGACGAG
	RT-PtNCED6-R	GGCATTTTCACTGAAGCTAC
819567	RT-AtGAPDH-F	TGAAATCAAAAAGCTATCAAGG
	RT-AtGAPDH-R	CATCATCCTCGGTGTATCCAA
	RT-GUS-F	GTTACGTCCTGTAGAAACCC
	RT-GUS-R	CACTTCCTGATTATTGACCC
	Over-expressing
	pbi121-W37-F	CGGGATCCGATTACAAGGATGATGATGATAAGATGTCTGATGAGAATAGGAGT
	pbi121-W37-R	GGGGTACCCTTATCATCATCATCCTTGTAATCTGGCTCCTGCTTGCGGAT
	prok2-ABF2-F	acgggggactctagaggatccATGGGGAGTAATTTGAACTTCAAAA
	prok2-ABF2-R	gcccttgctcaccatggtaccCCAGGGGCCAGTCAGTGTG
	prok2-ABI5-F	acgggggactctagaggatccATGAATTTCAAGAACTTCAGTGATATGC
	prok2-ABI5-R	gcccttgctcaccatggtaccCCAAGGGCCTGTTAGTGTTCTT
	Prokaryotic Expression
	VvW37-32a-F	TCCCCCGGGTATGTCTGATGAGAATAGGAGT
	VvW37-32a-R	GACTCGAGTGGCTCCTGCTTGCGGATGAA
	VvABF2-32a-F	CGGGATCCATGGGGAGTAATTTGAACTT
	VvABF2-32a-R	AAGCTTGTCACCAGGGGCCAGTCAGTG
	VvABI5-32a-F	CGGGATCCATGAATTTCAAGAACTTCAG
	VvABI5-32a-R	AAGCTTGCTACCAAGGGCCTGTTAGTG
	Promoter clone
	pW37-GUS-F	CCAAGCTTAGTGAGGAAATACCAAATC
	pW37-GUS-R	GCGTCGACTGGAGAAGAAGAAAAGAAG
	DNA probes
	PtA2-P1-F	TCATCTTTTCTTAATAGAATGACTAAGTAGCAAGTAGTATA
	PtA2-P1-R	TATACTACTTGCTACTTAGTCATTCTATTAAGAAAAGATGA
	PtA2-P2-F	GGTAAATCACGATATCATTGACGGAATAAAATCCGTCGG
	PtA2-P2-R	CCGACGGATTTTATTCCGTCAATGATATCGTGATTTACC
	PtA2-mP2-F	GGTAAATCACGATATaATcaACGGAATAAAATCCGTCGG
	PtA2-mP2-R	CCGACGGATTTTATTCCGTTGATTATATCGTGATTTACC
	PtA2-P3-F	CCGACGGACTGAATCCGTCACCATTTGACAGTAGCTGCCACA
	PtA2-P3-R	TGTGGCAGCTACTGTCAAATGGTGACGGATTCAGTCCGTCGG
	VvA4.2-P1-F	CAATTTCCTCTCATTGACTTGTTTCCCACA
	VvA4.2-P1-R	TGTGGGAAACAAGTCAATGAGAGGAAATTG
	VvA4.2-mP1-F	CAATTTCCTCTaATcaACTTGTTTCCCACA
	VvA4.2-mP1-R	TGTGGGAAACAAGTTGATTAGAGGAAATTG
	VvA4.2-P2-F	TGATTTTGACCCTTTTTATGACATTACATA
	VvA4.2-P2-R	TATGTAATGTCATAAAAAGGGTCAAAATCA
	VvA4.2-P3-F	GGTATCAATAAATTGACTATTTTTTCTTTA
	VvA4.2-P3-R	TAAAGAAAAAATAGTCAATTTATTGATACC
	W37-P1-F	CTCTCTCCCACGTGCCGACCTCACACGTGTTAGCCTCAT
	W37-P1-R	ATGAGGCTAACACGTGTGAGGTCGGCACGTGGGAGAGAG
	W37-P2-F	TCCAAATGCTTTCACGTAATTTCATTTGTT
	W37-P2-R	AACAAATGAAATTACGTGAAAGCATTTGGA
	W37-mP2-F	TCCAAATGCTTTaACaTgATTTCATTTGTT
	W37-mP2-R	AACAAATGAAATCATGTTAAAGCATTTGGA
	W37-P3-F	TCTTCTCAGTTGGAAACATTGACCGCCACTTCTTTCGCCCTTT
	W37-P3-R	AAAGGGCGAAAGAAGTGGCGGTCAATGTTTCCAACTGAGAAGA
	W37-mP3-F	TCTTCTCAGTTGGAAAaATcaACCGCCACTTCTTTCGCCCTTT
	W37-mP3-R	AAAGGGCGAAAGAAGTGGCGGTTGATTTTTCCAACTGAGAAGA
	W37-P4-F	TTGGTGACAAGAAAAAATACATTGACTGAGAGCAATGAAGATT
	W37-P4-R	AATCTTCATTGCTCTCAGTCAATGTATTTTTTCTTGTCACCAA
	W37-mP4-F	TTGGTGACAAGAAAAAATAaATcaACTGAGAGCAATGAAGATT
	W37-mP4-R	AATCTTCATTGCTCTCAGTTGATTTATTTTTTCTTGTCACCAA
	Y1H assay
	Wbox-pHIS2-F	ATTC ATTGACTTGACCGTCATCGGATTGACTTGACCGTCATCGG GAGCT
	Wbox-pHIS2-R	C CCGATGACGGTCAAGTCAATCCGATGACGGTCAAGTCAAT G
	mWbox-pHIS2-F	ATTC ATcaACTcaACCGTCATCGGATcaACTcaACCGTCATCGG GAGCT
	mWbox-pHIS2-R	AGCTCCCGATGACGGTTGAGTTGATCCGATGACGGTTGAGTTGATGAAT
	W37-AD-Nde-F	gtaccagattacgctcatatgATGTCTGATGAGAATAGGAGTACT
	W37-AD-EcoRI-R	atgcccacccgggtggaattcTGGCTCCTGCTTGCGGAT
	PtA2-dP2-F	ATTC TCACGATATCATTGACGGAATAAAATTCACGATATCATTGACGGAATAAAAT GAGCT
	PtA2-dP2-R	C ATTTTATTCCGTCAATGATATCGTGAATTTTATTCCGTCAATGATATCGTGA G
	PtA2-mdP2-F	ATTC TCACGATATaATcaACGGAATAAAATTCACGATATaATcaACGGAATAAAAT GAGCT
	PtA2-mdP2-R	C ATTTTATTCCGTTGATTATATCGTGAATTTTATTCCGTTGATTATATCGTGA G
	VvA4.2-dP1-F	ATTC ATTTCCTCTCATTGACTTGTTTCATTTCCTCTCATTGACTTGTTTC GAGCT
	VvA4.2-dP1-R	C GAAACAAGTCAATGAGAGGAAATGAAACAAGTCAATGAGAGGAAAT G
	VvA4.2-mdP1-F	ATTC ATTTCCTCTaATcaACTTGTTTCATTTCCTCTaATcaACTTGTTTC GAGCT
	VvA4.2-mdP1-R	C GAAACAAGTTGATGAGAGGAAATGAAACAAGTTGATGAGAGGAAAT G
	Transient expressing
	VvA4.2-dP1-minip35S:GUS-F	cttgcatgcctgcaggtcgacATTTCCTCTCATTGACTTGTTTCATTTCCTCTCATTGACTTGTTTCGGATCCGTGATTCTCCACTGA
	VvA4.2-dP1-minip35S:GUS-R	TCAGTGGAGAATCACGGATCCGAAACAAGTCAATGAGAGGAAATGAAACAAGTCAATGAGAGGAAATGTCGACCTGCAGGCATGCAAG
	luciferase assays
	W37-62SK-F	cgctctagaactagtggatccATGTCTGATGAGAATAGGAGTACTCCTT
	W37-62SK-R	gggccccccctcgaggtcgacTGGCTCCTGCTTGCGGAT
	VvABI5-62SK-F	cgctctagaactagtggatccATGAATTTCAAGAACTTCAGTGATATGC
	VvABI5-62SK-R	gggccccccctcgaggtcgacCCAAGGGCCTGTTAGTGTTCTT
	VvABF2-62SK-F	cgctctagaactagtggatccATGGGGAGTAATTTGAACTTCAAAA
	VvABF2-62SK-R	gggccccccctcgaggtcgacCCAGGGGCCAGTCAGTGTG
	pPtCYP707A2-LUC-F	gggccccccctcgaggtcgacCGTTAAATTAAGTTGTTGTT
	pPtCYP707A2-LUC-R	cgctctagaactagtggatccGTTGTAATAAAGAACAGTTA
	pW37-LUC-F	gggccccccctcgaggtcgacAGTGAGGAAATACCAAATCCATGAT
	pW37-LUC-R	cgctctagaactagtggatccTGGAGAAGAAGAAAAGAAGAGAGAAA
