# Supplementary material for: The VvWRKY37 Regulates Bud Break in Grape Vine Through ABA-Mediated Signaling Pathways
Source: Front Plant Sci. 2022 Jun 16;13:929892. doi: 10.3389/fpls.2022.929892 (PMC9245421; doi:10.3389/fpls.2022.929892)
Supplement: Supplementary file 4 [file Table_3.XLSX]

## Sheet: Sheet1
Table S3 The result of yeast one-hybrid library screening assay.The promoter of VvWRKY37 was cloned in-frame to the bait vector, and the bait vector was co-transformed with grapevine mRNA library vectors into yeast stain Y187.The candidate transformant grew well on selective medium and was subjected to DNA sequencing.
Number	Annotation
1	Vitis vinifera 60S ribosomal protein L37-3-like (LOC100247371), mRNA
2	Vitis vinifera arginine decarboxylase (LOC100233080), mRNA
3	Vitis vinifera uncharacterized LOC100854026 (LOC100854026), mRNA
4	Vitis vinifera cellulose synthase A catalytic subunit 8 [UDP-forming] (LOC100261696), mRNA
5	Vitis vinifera probable ATP-dependent RNA helicase ddx5 (LOC100260841), transcript variant X1, mRNA
6	Vitis vinifera 40S ribosomal protein S11 (LOC100244095), mRNA
7	Vitis vinifera reactive Intermediate Deaminase A, chloroplastic (LOC100265829), mRNA
8	Vitis vinifera uncharacterized LOC100244219 (LOC100244219)
9	Vitis vinifera eukaryotic translation initiation factor 4E-1 (LOC100262414)
10	Vitis vinifera polyadenylate-binding protein 2
11	Vitis vinifera indole-3-acetic acid-induced protein ARG2 (LOC100260685), mRNA
12	Vitis vinifera ripening-related protein-like (GRIP28), mRNA
13	Vitis vinifera ADP-ribosylation factor 2 (LOC100243082), transcript variant X2, mRNA
14	Vitis vinifera 60S ribosomal protein L19-like (LOC100267158), mRNA
15	Vitis vinifera xylose isomerase (LOC100254769), transcript variant X2, mRNA
16	Vitis vinifera uncharacterized protein At4g14100-like (LOC100241990), mRNA
17	Vitis vinifera KH domain-containing protein At4g18375 (LOC100261680), mRNA
18	Vitis vinifera cell number regulator 8 (LOC100246592), mRNA
19	Vitis vinifera ras-related protein RABF1 (LOC100259851), mRNA
20	Vitis vinifera auxin-repressed 12.5 kDa protein (LOC100260521), mRNA
21	Vitis vinifera uncharacterized protein At4g14100-like (LOC100241990)
22	Vitis vinifera ER membrane protein complex subunit 3-like (LOC100853397),
23	Vitis vinifera CBL-interacting protein kinase 03 (CIPK03), mRNA
24	Vitis vinifera transmembrane protein 111-like (LOC100245100), mRNA
25	Vitis vinifera probable metal-nicotianamine transporter YSL7 (LOC100264553), mRNA
26	Vitis vinifera uncharacterized LOC100253419 (LOC100253419), transcript variant X3, Mrna
27	Vitis vinifera E3 ubiquitin-protein ligase RGLG1 (LOC100249896), transcript variant X8, mRNA
28	Vitis vinifera methyltransferase-like protein 5 (LOC100264490), transcript variant X1, Mrna
29	Vitis vinifera cytochrome P450 78A5 (LOC100253660), mRNA
30	Vitis vinifera uncharacterized endoplasmic reticulum membrane protein C16E8.02-like (LOC100246665), Mrna
31	Vitis vinifera peptide-N4-(N-acetyl-beta-glucosaminyl)asparagine amidase A (LOC100251909), mRNA
32	Vitis vinifera transmembrane protein 205-like (LOC100241835),
33	Vitis vinifera uncharacterized LOC100253419 (LOC100253419)
34	Vitis vinifera endochitinase A-like (LOC100268106)
35	Vitis vinifera ARM REPEAT PROTEIN INTERACTING WITH ABF2-like (LOC100262114),
36	Vitis vinifera uncharacterized LOC100254371 (LOC100254371)
37	Vitis vinifera prosaposin (LOC100255017)
38	Vitis vinifera uncharacterized LOC100259158 (LOC100259158)
39	Vitis vinifera ripening-related protein-like (GRIP31)
40	Vitis vinifera ribosomal RNA small subunit methyltransferase nep-1 (LOC100260745)
41	Vitis vinifera uncharacterized LOC100249303 (LOC100249303)
42	Vitis vinifera FK506-binding protein 4 (LOC100247492)
43	Vitis vinifera aquaporin-like (TIP1;2)
44	Vitis vinifera glutathione S-transferase U7 (LOC100241712)
45	Vitis vinifera S-adenosyl-L-methionine decarboxylase (SAMDC)
46	Vitis vinifera uncharacterized LOC100266406 (LOC100266406)
